# Supplementary material for: Interaction effects on a gold nanoparticle-based colorimetric assay for antioxidant capacity evaluation of polyphenols
Source: Royal Society of Chemistry journal article supplement (doi:10.1039/d0ra01861a), 2020-01-01
Supplement: d0ra01861a1.pdf [file d0ra01861a1.pdf]

## Supporting Information

**Interaction effects on gold nanoparticle-based colorimetric assay for antioxidant capacity**

**evaluation of polyphenols**

Yanhui Wang <sup>a</sup>, Shiqi Liu <sup>a</sup>, Mengnan Yang <sup>a</sup>, Ahmed Aboueloyoun Taha <sup>a</sup>, Jing Wang <sup>b</sup>, Chao Ma <sup>a,\*</sup>

<sup>a</sup> Beijing Key Laboratory of Forest Food Processing and Safety, College of Biological Sciences and Biotechnology, Beijing Forestry University, Beijing, 100083, PR China

<sup>b</sup> Institute of Quality Standard and Testing Technology for Agro-products, Chinese Academy of Agricultural Sciences, Beijing, 100081, China

**\*Corresponding Author.**

E-mail address: machao@bjfu.edu.cn; Tel.: +86-10-6233-6700; Fax: +86-10-6233-6700

**Table**

**Table S1.** The antioxidant capacities of 12 polyphenols determined by DPPH, ABTS, FRAP and AuNPs assays.

**Table S2.** Correlation coefficient ( $r$ ) among different assays for antioxidant capacity estimation of 12 polyphenols

**Table S3.** The antioxidant capacities of 12 equimolar binary and ternary polyphenol combinations determined by DPPH, ABTS, FRAP and AuNPs assays.

**Table S4.** Correlation coefficient ( $r$ ) among different assays for antioxidant capacity estimation of 12 equimolar binary and ternary polyphenol combinations determined by DPPH, ABTS, FRAP and AuNPs assays.

**Table S5.** The total phenolic contents (TPC), total flavonoid contents (TFC) and antioxidant capacities of polyphenolic extracts from 6 food samples.

**Table S6.** Correlation coefficient ( $r$ ) among different assays for antioxidant capacity estimation of polyphenolic extracts from 6 food samples.

**Table S1**

| No. | Compounds               | Antioxidant capacities (mM TE/g) |            |            |            |
|-----|-------------------------|----------------------------------|------------|------------|------------|
|     |                         | DPPH                             | ABTS       | FRAP       | AuNP       |
| 1   | gallic acid             | 24.84±0.01                       | 17.08±0.02 | 25.55±0.03 | 2.52±0.01  |
| 2   | protocatechuic acid     | 7.44±0.03                        | 6.54±0.01  | 11.28±0.00 | 1.48±0.00  |
| 3   | caffeic acid            | 5.00±0.00                        | 6.24±0.01  | 7.68±0.01  | 2.07±0.02  |
| 4   | vanillic acid           | 0.57±0.00                        | 6.34±0.01  | 2.92±0.00  | 1.52±0.05  |
| 5   | ferulic acid            | 3.15±0.00                        | 12.50±0.02 | 6.74±0.01  | 1.73±0.03  |
| 6   | <i>p</i> -coumaric acid | 0.27±0.00                        | 5.42±0.02  | 1.63±0.01  | 1.37±0.01  |
| 7   | apigenin                | 0.03±0.01                        | 1.08±0.01  | 1.31±0.00  | 0.45±0.01  |
| 8   | luteolin                | 10.30±0.01                       | 2.02±0.00  | 6.29±0.01  | 7.84±0.18  |
| 9   | rutin                   | 3.36±0.02                        | 2.35±0.05  | 2.80±0.01  | 1.21±0.01  |
| 10  | quercetin               | 9.23±0.01                        | 11.43±0.02 | 7.99±0.01  | 8.01±0.01  |
| 11  | EGC                     | 7.64±0.01                        | 18.20±0.01 | 7.42±0.01  | 11.68±0.01 |
| 12  | EGCG                    | 9.55±0.02                        | 14.69±0.02 | 4.20±0.02  | 9.15±0.05  |

**Table S2**

|       | DPPH | ABTS   | FRAP    | AuNPs |
|-------|------|--------|---------|-------|
| DPPH  | 1    | 0.580* | 0.909** | 0.321 |
| ABTS  |      | 1      | 0.553   | 0.540 |
| FRAP  |      |        | 1       | 0.025 |
| AuNPs |      |        |         | 1     |

\*,  $p < 0.05$ ; \*\*,  $p < 0.01$

**Table S3.**

| NO. | Combination                              | Antioxidant capacities (mM TE/g) |            |            |            |
|-----|------------------------------------------|----------------------------------|------------|------------|------------|
|     |                                          | DPPH                             | ABTS       | FRAP       | AuNP       |
| 1   | Gallic acid+ Protocatechuic acid         | 8.10±0.02                        | 12.37±0.01 | 16.31±0.02 | 3.74±0.00  |
| 2   | Gallic acid+ Caffeic acid                | 8.86±0.01                        | 11.31±0.02 | 13.02±0.01 | 3.13±0.02  |
| 3   | Caffeic acid+ Ferulic acid               | 3.49±0.02                        | 10.11±0.03 | 5.64±0.00  | 5.07±0.01  |
| 4   | Rutin+ Quercetin                         | 6.73±0.03                        | 4.29±0.02  | 4.85±0.00  | 5.46±0.05  |
| 5   | Gallic acid+ Rutin                       | 6.01±0.02                        | 6.15±0.03  | 7.09±0.02  | 2.34±0.08  |
| 6   | Luteolin+ Rutin                          | 7.40±0.02                        | 3.52±0.00  | 5.40±0.00  | 5.27±0.09  |
| 7   | Gallic acid+ EGC                         | 8.43±0.04                        | 16.61±0.02 | 11.68±0.02 | 12.89±0.01 |
| 8   | Luteolin+ Rutin+ EGC                     | 5.45±0.03                        | 9.85±0.01  | 5.90±0.00  | 5.82±0.05  |
| 9   | Gallic acid+ Rutin+EGC                   | 7.33±0.06                        | 15.26±0.00 | 11.50±0.00 | 5.17±0.03  |
| 10  | Gallic acid+ Vanillic acid+ Ferulic acid | 6.66±0.11                        | 8.18±0.00  | 13.50±0.00 | 6.38±0.02  |
| 11  | Gallic acid+ Quercetin+ Rutin            | 7.59±0.05                        | 12.17±0.00 | 16.10±0.00 | 5.20±0.00  |
| 12  | EGC+ Ferulic acid+Luteolin               | 4.30±0.06                        | 12.11±0.00 | 9.10±0.00  | 8.73±0.09  |

**Table S4.**

|       | DPPH | ABTS  | FRAP   | AuNPs  |
|-------|------|-------|--------|--------|
| DPPH  | 1    | 0.215 | 0.585* | -0.001 |
| ABTS  |      | 1     | 0.603* | 0.468  |
| FRAP  |      |       | 1      | 0.023  |
| AuNPs |      |       |        | 1      |

\*,  $p < 0.05$ ; \*\*,  $p < 0.01$

**Table S5.**

| Samples     | TPC<br>mg GAE/100g | TF<br>mg RE/100g | Antioxidant capacities mM TE/ 100 g |           |           |           |
|-------------|--------------------|------------------|-------------------------------------|-----------|-----------|-----------|
|             |                    |                  | DPPH                                | ABTS      | FRAP      | AuNPs     |
| Raspberry   | 209.33±0.02        | 176.48±0.01      | 1.57±0.01                           | 8.48±0.03 | 2.41±0.00 | 0.67±0.01 |
| Apple       | 107.70±0.01        | 161.84±0.01      | 0.81±0.01                           | 3.5±0.00  | 0.94±0.00 | 0.34±0.03 |
| Grape       | 174.29±0.01        | 220.40±0.02      | 1.33±0.01                           | 5.40±0.03 | 1.57±0.00 | 0.52±0.03 |
| Tangerine   | 168.04±0.01        | 45.40±0.00       | 0.37±0.00                           | 4.14±0.02 | 1.34±0.00 | 0.19±0.08 |
| bell pepper | 97.43±0.00         | 26.08±0.00       | 0.81±0.03                           | 3.13±0.01 | 0.99±0.00 | 0.25±0.03 |
| Tomato      | 31.69±0.00         | 10.57±0.00       | 0.09±0.01                           | 0.17±0.02 | 0.60±0.00 | 0.10±0.00 |

**Table S6.**

|       | TPC | TF    | DPPH   | ABTS    | FRAP    | AuNPs   |
|-------|-----|-------|--------|---------|---------|---------|
| TPC   | 1.0 | 0.662 | 0.760  | 0.944** | 0.916*  | 0.839*  |
| TF    |     | 1.0   | 0.836* | 0.716   | 0.632   | 0.866*  |
| DPPH  |     |       | 1.0    | 0.890*  | 0.828*  | 0.983** |
| ABTS  |     |       |        | 1.0     | 0.972** | 0.944** |
| FRAP  |     |       |        |         | 1.0     | 0.887*  |
| AuNPs |     |       |        |         |         | 1.0     |

\*,  $p < 0.05$ ; \*\*,  $p < 0.01$
